# Supplementary material for: Alternative Splicing Events Identified in Human Embryonic Stem Cells and Neural Progenitors
Source: PLoS Comput Biol. 2007 Oct 26;3(10):e196. doi: 10.1371/journal.pcbi.0030196 (PMC2041973; doi:10.1371/journal.pcbi.0030196)
Supplement: Table S4 — For example, in row 6 ACCTG was enriched in the downstream intronic regions of exons included in ES and skipped in NP, relative to REAP[−] exons. (34 KB DOC) [file pcbi.0030196.st004.xls]

## Sheet: final
Supplementary Table 4. Conserved 5-mers enriched in downstream/upstream intronic regions of REAP[+] exons included in ES (NP) and skipped in NP (ES), For example, in row 6 ACCTG was enriched in the downstream intronic regions of exons included in ES and skipped in NP, relative to REAP[-] exons.
	Upstream/downstream intronic region	Enriched in introns of ES (NP) included exons; skipped in NP (ES)	Element
1	Downstream	ES,NP	AGTAG
2	Downstream	ES,NP	CCGCC
3	Downstream	ES,NP	GCATG
4	Downstream	ES,NP	TGGGG
5	Downstream	ES,NP	TTTTT
6	Downstream	ES	ACCTG
7	Downstream	ES	CCCGC
8	Downstream	ES	CCGCG
9	Downstream	ES	CGCCC
10	Downstream	ES	CGCGC
11	Downstream	ES	GAAGA
12	Downstream	ES	GAGGG
13	Downstream	ES	GAGTG
14	Downstream	ES	GCACT
15	Downstream	ES	GCCGC
16	Downstream	ES	GCGCC
17	Downstream	ES	GCTCT
18	Downstream	ES	GTGGG
19	Downstream	ES	TAAGC
20	Downstream	ES	TATAA
21	Downstream	ES	TGCTC
22	Downstream	ES	TGGGA
23	Downstream	ES	TGTAG
24	Downstream	NP	AACTC
25	Downstream	NP	AACTG
26	Downstream	NP	AAGAT
27	Downstream	NP	AATAA
28	Downstream	NP	AATTG
29	Downstream	NP	ACCAA
30	Downstream	NP	ACTGC
31	Downstream	NP	AGAAG
32	Downstream	NP	AGAGC
33	Downstream	NP	AGCTC
34	Downstream	NP	AGGAG
35	Downstream	NP	AGGGC
36	Downstream	NP	AGGGG
37	Downstream	NP	AGGTG
38	Downstream	NP	AGTTA
39	Downstream	NP	ATAGT
40	Downstream	NP	ATCAG
41	Downstream	NP	ATGCT
42	Downstream	NP	CAACT
43	Downstream	NP	CACCC
44	Downstream	NP	CAGCT
45	Downstream	NP	CAGTT
46	Downstream	NP	CATGT
47	Downstream	NP	CCACC
48	Downstream	NP	CCTGA
49	Downstream	NP	CCTGC
50	Downstream	NP	CTAAC
51	Downstream	NP	CTCAC
52	Downstream	NP	CTCAT
53	Downstream	NP	CTCCA
54	Downstream	NP	CTCCT
55	Downstream	NP	CTGAT
56	Downstream	NP	CTGCA
57	Downstream	NP	CTGCT
58	Downstream	NP	CTGGG
59	Downstream	NP	CTTGC
60	Downstream	NP	GCAGA
61	Downstream	NP	GCCAC
62	Downstream	NP	GCCCT
63	Downstream	NP	GCCTG
64	Downstream	NP	GCTGG
65	Downstream	NP	GCTTG
66	Downstream	NP	GCTTT
67	Downstream	NP	GGAAT
68	Downstream	NP	GGAGA
69	Downstream	NP	GGAGG
70	Downstream	NP	GGAGT
71	Downstream	NP	GGCAG
72	Downstream	NP	GGCCT
73	Downstream	NP	GGCTG
74	Downstream	NP	GGCTT
75	Downstream	NP	GGGAG
76	Downstream	NP	GGGCA
77	Downstream	NP	GGGCC
78	Downstream	NP	GGGGA
79	Downstream	NP	GGGGC
80	Downstream	NP	GGGGG
81	Downstream	NP	GGGGT
82	Downstream	NP	GTCCT
83	Downstream	NP	GTGCC
84	Downstream	NP	GTGGC
85	Downstream	NP	GTTTA
86	Downstream	NP	TACCA
87	Downstream	NP	TAGCT
88	Downstream	NP	TCAGT
89	Downstream	NP	TCTCC
90	Downstream	NP	TGCAA
91	Downstream	NP	TGCAT
92	Downstream	NP	TGCTG
93	Downstream	NP	TGCTT
94	Downstream	NP	TGGAA
95	Downstream	NP	TGGCT
96	Downstream	NP	TGGTG
97	Downstream	NP	TGTGA
98	Downstream	NP	TTGCT
99	Downstream	NP	TTGTG
100	Upstream	ES,NP	CTCTG
101	Upstream	ES,NP	GCATG
102	Upstream	ES,NP	GTTTT
103	Upstream	ES,NP	TGCTC
104	Upstream	ES,NP	TGGTA
105	Upstream	ES,NP	TGTGT
106	Upstream	ES	AAAAA
107	Upstream	ES	AAAAG
108	Upstream	ES	AATTG
109	Upstream	ES	ACCAT
110	Upstream	ES	ACTGC
111	Upstream	ES	AGAAC
112	Upstream	ES	AGTTA
113	Upstream	ES	ATATC
114	Upstream	ES	CAGAA
115	Upstream	ES	CCCCG
116	Upstream	ES	CGCCC
117	Upstream	ES	CTAAC
118	Upstream	ES	GAAAA
119	Upstream	ES	GCAGT
120	Upstream	ES	GCGCC
121	Upstream	ES	GCTGT
122	Upstream	ES	GGTAG
123	Upstream	ES	GGTCA
124	Upstream	ES	GGTTT
125	Upstream	ES	GTAGC
126	Upstream	ES	GTATA
127	Upstream	ES	GTCTG
128	Upstream	ES	GTGAT
129	Upstream	ES	GTTTC
130	Upstream	ES	TACAC
131	Upstream	ES	TACCA
132	Upstream	ES	TATAT
133	Upstream	ES	TCTGC
134	Upstream	ES	TCTGG
135	Upstream	ES	TGATT
136	Upstream	ES	TGCGG
137	Upstream	ES	TGTAG
138	Upstream	ES	TTAAC
139	Upstream	ES	TTACA
140	Upstream	NP	AAAAC
141	Upstream	NP	AACAA
142	Upstream	NP	AATAG
143	Upstream	NP	AATCC
144	Upstream	NP	AATGC
145	Upstream	NP	ACACC
146	Upstream	NP	AGCTA
147	Upstream	NP	AGGAT
148	Upstream	NP	AGGCC
149	Upstream	NP	AGGTA
150	Upstream	NP	AGTGA
151	Upstream	NP	ATGCT
152	Upstream	NP	ATTTT
153	Upstream	NP	CAGCT
154	Upstream	NP	CATGC
155	Upstream	NP	CATGT
156	Upstream	NP	CCCAT
157	Upstream	NP	CCCTC
158	Upstream	NP	CCTCC
159	Upstream	NP	CCTCT
160	Upstream	NP	CCTTC
161	Upstream	NP	CGCCT
162	Upstream	NP	CTAGT
163	Upstream	NP	CTCCC
164	Upstream	NP	CTCTC
165	Upstream	NP	CTGCT
166	Upstream	NP	CTGTC
167	Upstream	NP	CTTCA
168	Upstream	NP	CTTGC
169	Upstream	NP	GCATA
170	Upstream	NP	GCCAT
171	Upstream	NP	GCTCT
172	Upstream	NP	GCTTT
173	Upstream	NP	GGGAA
174	Upstream	NP	GGGAG
175	Upstream	NP	GGGGG
176	Upstream	NP	GGGGT
177	Upstream	NP	GGGTA
178	Upstream	NP	GTAGA
179	Upstream	NP	GTCCT
180	Upstream	NP	GTGGC
181	Upstream	NP	GTGTG
182	Upstream	NP	TAAAA
183	Upstream	NP	TAACC
184	Upstream	NP	TACTG
185	Upstream	NP	TAGAC
186	Upstream	NP	TAGTT
187	Upstream	NP	TATTT
188	Upstream	NP	TCCCT
189	Upstream	NP	TCCTC
190	Upstream	NP	TCTAA
191	Upstream	NP	TCTCT
192	Upstream	NP	TCTTC
193	Upstream	NP	TCTTG
194	Upstream	NP	TGCAT
195	Upstream	NP	TGCGT
196	Upstream	NP	TGCTG
197	Upstream	NP	TGTCC
198	Upstream	NP	TGTCT
199	Upstream	NP	TGTGC
200	Upstream	NP	TTCTT
201	Upstream	NP	TTGTC
202	Upstream	NP	TTGTT
203	Upstream	NP	TTTAT
204	Upstream	NP	TTTCT
205	Upstream	NP	TTTGT
206	Upstream	NP	TTTTG
207	Upstream	NP	TTTTT
